# Supplementary material
Source: PubMed Central journal article supplement (PMC4551596)
Supplement: EC.00081-15_zek999094474so2.pdf [file EC.00081-15_zek999094474so2.pdf]

## Supporting information

### Supplementary figure legends

**Figure S1.** mRNA abundance of *STREP-ATG8* gene in wild-type cells (WT) and cells expressing P<sub>CYC6</sub>-driven ATG8 (STREP-ATG8) treated with different concentrations of Ni<sup>2+</sup> for 8 hours. mRNA levels were compared and normalized to control cells (expression = 1). The data are represented as mean ± standard deviation from three independent experiments.

**Figure S2.** Immunolocalization of ATG8 in *cw15* cells grown to log phase in TAP medium and treated with 100 μM Ni<sup>2+</sup>, 150 μM Co<sup>2+</sup>, 150 μM Cu<sup>2+</sup>, 150 μM Cd<sup>2+</sup> or 2 μM Hg<sup>2+</sup> for 8 hours. Control refers to untreated cells.

**Figure S3.** (a) mRNA abundance (FPKM) of selected genes taken from Ni<sup>2+</sup> and H<sub>2</sub>O<sub>2</sub> transcriptome data sets. (b) Expression analysis of *GSTS1* and *GPXH* genes by qPCR in *cw15* cells treated with 100 μM Ni<sup>2+</sup> for 8 hours. C refers to untreated control cells. mRNA levels were compared and normalized to control cells (expression = 1). The data are represented as mean ± standard deviation from three independent experiments.

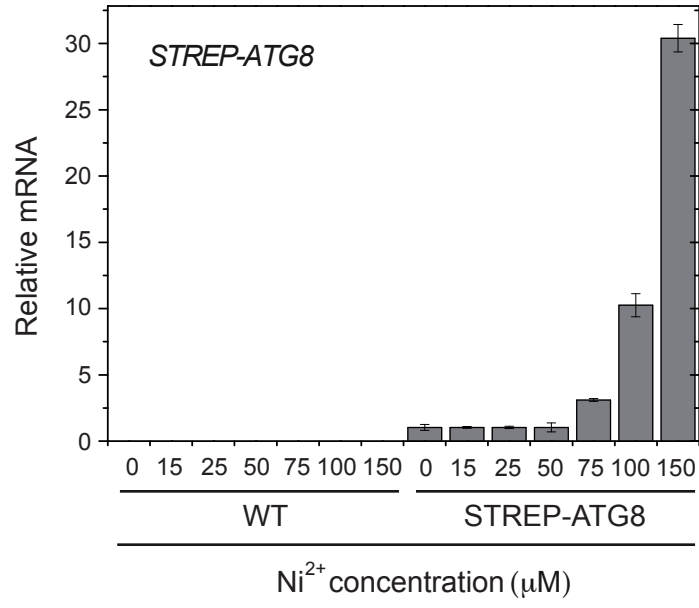

**Fig. S1**

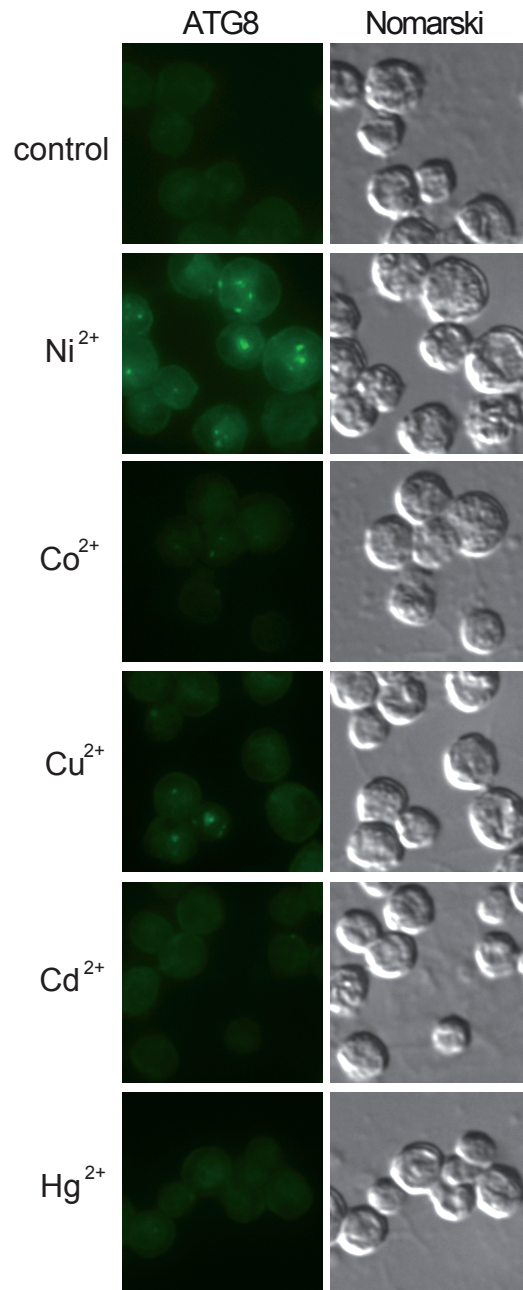

Fig. S2

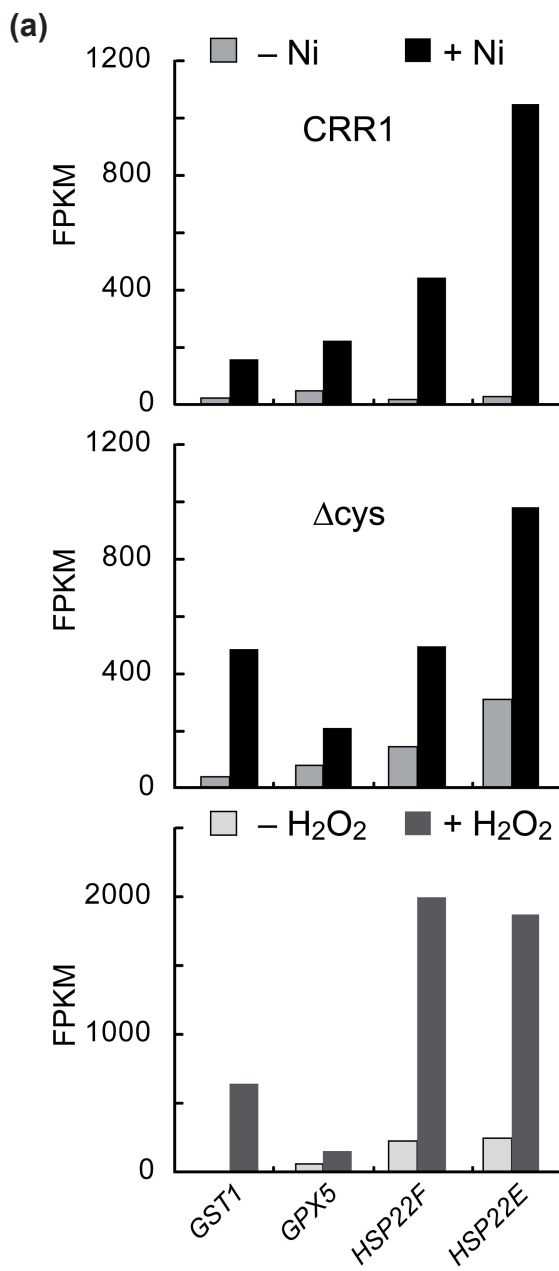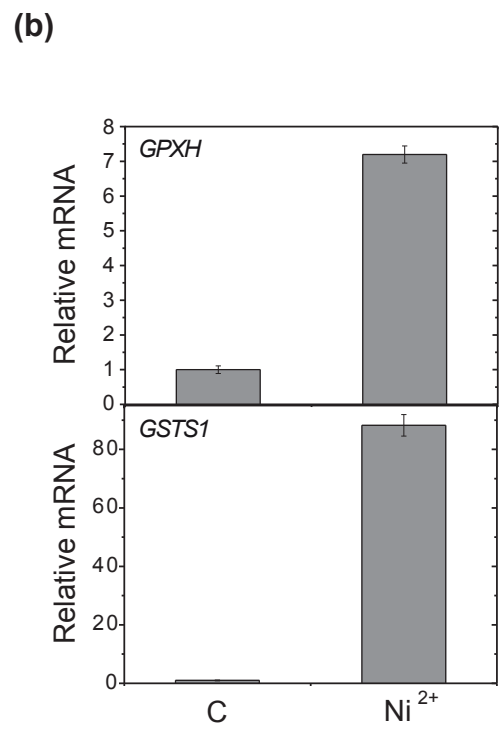

**Fig. S3**
